# Supplementary material for: Comparative Analysis of Different Serological and Molecular Tests for the Detection of Small Ruminant Lentiviruses (SRLVs) in Belgian Sheep and Goats
Source: MDPI journal article supplement (doi:10.3390/v10120696), 2018-12-08
Supplement: s1 [file s1]

**Supplementary Table S1.** Overview of the different serological test kits used and their characteristics.

|                                                         | ELISA type | Antigen/ target <sup>a</sup>                                                                 | Serum volume | Duration <sup>b</sup> |
|---------------------------------------------------------|------------|----------------------------------------------------------------------------------------------|--------------|-----------------------|
| <b>Agar Gel Immunodiffusion</b>                         |            |                                                                                              |              |                       |
| AGID CAEV P28 kit (Idexx)                               |            | CAEV capsid p28                                                                              | 63µl         | 3 days                |
| Maeditect kit (Apha Scientific)                         |            | MVV gp135                                                                                    | 52µl         | 3 days                |
| <b>ELISAs</b>                                           |            |                                                                                              |              |                       |
| Elitest MVV/ CAEV (Hyphen BioMed)                       | Indirect   | MVV capsid rp25 and gp46 TM                                                                  | 2-4µl        | 150 min               |
| MVV/ CAEV p28 Ab screening test (Idexx)                 | Indirect   | CAEV capsid p28                                                                              | 10µl         | 110min                |
| ID screen® MVV/CAEV indirect (IDVet)                    | Indirect   | Panel of MVV/ CAEV TM proteins, p25 and gp135                                                | 10µl         | 90 min                |
| LSIVet™ Ruminant Maedi-Visna/CAEV serum ELISA kit (LSI) | Blocking   | Panel of MVV/CAEV proteins                                                                   | 50µl         | 170 min               |
| Eradikit™ SRLV screening test (IN3 diagnostic)          | Indirect   | Mix of gag and env peptides belonging to the 3 most divergent SRLV viral genotypes (A, B, E) | 5µl          | 140min                |

<sup>a</sup> Information about antigen/target coated on the microtiter plate were found either on the manufacturer's website or in literature

<sup>b</sup>Time to result. These durations were estimated based on incubation times provided by the kits. Time to prepare samples, washing and reading steps were not included

Abbreviations: r, recombinant; MVV, Maedi Visna Virus; CAEV, caprine arthritis encephalitis virus; TM, transmembrane; gp, glycoprotein

**Supplementary Table S2.** Overview of the sample cohorts.

|         | Origin             | N° of animals          | Type of samples           | Description                                                                                                                                                                                                                                      |
|---------|--------------------|------------------------|---------------------------|--------------------------------------------------------------------------------------------------------------------------------------------------------------------------------------------------------------------------------------------------|
| Panel 1 | Field              | 553 sheep<br>394 goats | Sera<br>Leucocyte pellets | Samples were collected in the context of a nationwide SRLV seroprevalence study where sheep and goat holders were randomly selected all over Belgium. Farmers included in this study were not participating to the national SRLV control program |
| Panel 2 | Routine diagnostic | 21 sheep<br>29 goats   | Sera                      | Positive sera were picked from our routine diagnostic where they were previously found positive with the AGID CAEV P28 kit                                                                                                                       |

Panel 3 Experimental infection

2 sheep  
1 goat

Sera  
Leucocyte pellets

Sequential samples were collected during an experimental infection of 2 sheep and 1 goat infected with a genotype A and a genotype B strains respectively. Animals were bled every week for 8 weeks in total.

---
